# Supplementary material for: CSF1R Inhibition Combined with GM-CSF Reprograms Macrophages and Disrupts Protumoral Interplays with AML Cells
Source: MDPI journal article supplement (doi:10.3390/cancers13215289), 2021-10-21
Supplement: s1 [file s1]

**Table S1:** FAB, WHO 2016 and ELN 2017 genetic risk classifications from included patients.

t-AML: therapy-related AML, MRC: myelodysplasia-related changes, RGA: recurrent genetic abnormalities.

| patient# | FAB      | WHO 2016               | ELN 2017 genetic risk | Samples |
|----------|----------|------------------------|-----------------------|---------|
| 1        | AML M1   | AML with RGA           | Favorable             | PB      |
| 2        | AML M4Eo | AML with RGA           | Favorable             | BM & PB |
| 3        | AML M5   | AML with RGA           | Favorable             | BM & PB |
| 4        | AML M4   | AML with RGA           | Favorable             | BM & PB |
| 5        | AML M4   | AML with RGA           | Favorable             | BM & PB |
| 6        | AML M2   | AML with RGA           | Favorable             | BM      |
| 7        | AML M2   | AML with RGA           | Favorable             | BM      |
| 8        | AML M4   | AML with RGA           | Favorable             | BM & PB |
| 9        | AML M2   | AML with RGA           | Favorable             | PB      |
| 10       | AML M2   | AML with maturation    | Intermediate          | BM      |
| 11       | AML M2   | AML with RGA           | Intermediate          | BM      |
| 12       | AML M5   | AML with RGA           | Intermediate          | BM      |
| 13       | AML M2   | AML with RGA           | Intermediate          | PB      |
| 14       | AML M2   | AML with RGA           | Intermediate          | BM & PB |
| 15       | AML M2   | AML with RGA           | Intermediate          | PB      |
| 16       | AML M4   | AML with RGA           | Intermediate          | PB      |
| 17       | AML M2   | AML with RGA           | Intermediate          | BM & PB |
| 18       | AML M4   | AML with RGA           | Intermediate          | PB      |
| 19       | AML M5   | AML with RGA           | Adverse               | BM      |
| 20       | AML M5   | AML with MRC           | Adverse               | PB      |
| 21       | AML M4   | Monoblastic AML        | Adverse               | BM      |
| 22       | AML M5   | Monoblastic AML        | Adverse               | BM      |
| 23       | AML M4   | AML with MRC           | Adverse               | BM & PB |
| 24       | AML M2   | AML with MRC           | Adverse               | BM      |
| 25       | AML M2   | AML with maturation    | Adverse               | BM      |
| 26       | AML M1   | AML without maturation | Adverse               | BM      |
| 27       | AML M4   | AML with MRC           | Adverse               | PB      |
| 28       | AML M1   | AML with MRC           | Adverse               | BM      |
| 29       | AML M4   | AML with MRC           | Adverse               | BM      |
| 30       | AML M5   | AML with MRC           | Adverse               | BM      |
| 31       | AML M1   | AML with MRC           | Adverse               | BM & PB |
| 32       | AML M4   | AML with MRC           | Adverse               | PB      |
| 33       | AML M1   | AML with MRC           | Adverse               | BM      |
| 34       | AML M4   | AML with MRC           | Adverse               | BM      |
| 35       | AML M2   | AML with maturation    | Adverse               | BM & PB |
| 36       | AML M4   | AML with MRC           | Adverse               | BM      |
| 37       | AML M4   | Myelomonocytic AML     | Adverse               | BM      |
| 38       | AML M5   | t-AML                  | Adverse               | BM      |
| 39       | AML M2   | AML with maturation    | Adverse               | BM      |
| 40       | AML M4   | t-AML                  | Adverse               | BM      |
| 41       | AML M2   | AML with maturation    | Adverse               | BM      |
| 42       | AML M2   | AML with maturation    | Adverse               | PB      |

**Table S2:** Antibodies for FC.

| Target (human)/clone            | Fluorophore            | Product #        | Supplier        |
|---------------------------------|------------------------|------------------|-----------------|
| CD45                            | KrO                    | B36294           | Beckman Coulter |
| CD14 clone TUK4                 | PE                     | R0864            | Dako            |
| CD14 clone 63D3                 | APC                    | 367118           | Biolegend       |
| CD163 clone GHI/61              | BV 421                 | 333612           | Biolegend       |
| CD80 clone 2D10                 | APC                    | 305220           | Biolegend       |
| CD206 clone 15-2                | FITC                   | 321104           | Biolegend       |
| SIRP $\alpha/\beta$ clone SE5A5 | PE/Cy7                 | 323808           | Biolegend       |
| CD47 clone CC2C6                | Alexa Fluor 700        | 323126           | Biolegend       |
| PD-L1 clone MIH1                | PE-Cyanine 7           | 25-5983-42       | eBioscience     |
| CSF-1R clone 9-4D21E4           | PC5.5                  | 347 310          | Biolegend       |
| CD34                            | Alexa Fluor 700 or 750 | A86354 or B92463 | Beckman Coulter |
| CD38                            | ECD                    | A99022           | Beckman Coulter |
| CD117                           | PC5.5                  | B96754           | Beckman Coulter |
| CD16                            | PC7                    | 6607118          | Beckman Coulter |
| CD4                             | PC7                    | 737660           | Beckman Coulter |
| CD8                             | PC7                    | 737661           | Beckman Coulter |
| CD3                             | APC-Alexa Fluor 750    | A94680           | Beckman Coulter |
| CD56                            | PC5.5                  | B49189           | Beckman Coulter |
| CD123                           | PC7                    | B13647           | Beckman Coulter |
| CD19                            | APC-Alexa Fluor 700    | B49212           | Beckman Coulter |

**Table S3:** Relative quantification of all cytokines from membranes depicted on Figure S5.

|                    | AML#3 | AML#18 | AML#23 | HL-60  | U937  | AML#3<br>+Mo | AML#23<br>+Mo | M-MΦ  | GM-MΦ | R <sup>GM/GW</sup><br>MΦ | HD <sup>AML#3</sup><br>MΦ | HD <sup>AML#3</sup> -MΦ<br>+GM/GW | HD <sup>AML#23</sup><br>MΦ | HD <sup>AML#23</sup> -MΦ<br>+GM/GW |
|--------------------|-------|--------|--------|--------|-------|--------------|---------------|-------|-------|--------------------------|---------------------------|-----------------------------------|----------------------------|------------------------------------|
| <b>adiponectin</b> | ND    | ND     | ND     | ND     | ND    | ND           | ND            | 126.2 | ND    | 122.1                    | 59.2                      | 107.0                             | 48.2                       | 79.3                               |
| <b>Ang-1</b>       | ND    | ND     | 45.8   | ND     | ND    | 46.1         | 66.5          | 83.0  | 37.0  | 51.5                     | 54.0                      | 87.3                              | 109.9                      | 85.6                               |
| <b>Ang-2</b>       | 134.3 | 71.5   | 67.5   | 57.6   | 38.5  | 74.3         | 59.9          | 271.0 | 215.3 | 260.7                    | 210.7                     | 368.5                             | 240.6                      | 290.0                              |
| <b>angiogenin</b>  | 109.0 | ND     | ND     | ND     | ND    | 749.4        | 558.0         | 714.7 | 295.7 | 511.3                    | 953.3                     | 829.1                             | 977.0                      | 861.7                              |
| <b>ApoA1</b>       | ND    | ND     | ND     | ND     | ND    | 177.2        | 200.9         | 151.2 | 109.0 | 119.2                    | 137.4                     | 189.9                             | 80.3                       | 115.4                              |
| <b>BAFF</b>        | 510.8 | ND     | 108.7  | 1108.6 | 661.3 | 411.8        | 553.9         | 536.2 | 85.2  | 187.3                    | 392.5                     | 638.6                             | 402.2                      | 314.8                              |
| <b>Basigin</b>     | 362.4 | 417.0  | 225.6  | 591.9  | 331.7 | 573.8        | 425.8         | 737.3 | 581.0 | 768.0                    | 438.6                     | 629.5                             | 448.5                      | 488.1                              |
| <b>BDNF</b>        | 128.6 | 50.8   | 47.6   | 203.2  | ND    | ND           | ND            | 312.2 | 204.3 | 224.7                    | 127.3                     | 148.1                             | 94.2                       | 124.6                              |
| <b>C5/C5a</b>      | ND    | ND     | ND     | ND     | ND    | ND           | 66.1          | 70.8  | ND    | 54.2                     | 70.1                      | 160.4                             | 72.7                       | 121.1                              |
| <b>CCL17</b>       | 211.6 | ND     | ND     | ND     | ND    | 466.3        | 74.8          | 380.2 | 960.2 | 995.2                    | 116.0                     | 966.0                             | 121.1                      | 956.0                              |
| <b>CCL19</b>       | 108.4 | 37.0   | ND     | 50.6   | 22.4  | 61.1         | 124.9         | 141.5 | 164.2 | 727.0                    | 56.2                      | 902.4                             | 109.5                      | 839.2                              |
| <b>CCL2</b>        | 753.0 | ND     | ND     | 375.3  | 526.3 | 833.5        | 801.3         | 701.1 | 677.7 | 678.6                    | 846.6                     | 845.5                             | 767.6                      | 762.7                              |
| <b>CCL20</b>       | 104.8 | ND     | ND     | 644.1  | ND    | 122.4        | 186.4         | 200.3 | 381.3 | 790.3                    | 129.8                     | 1006.1                            | 609.6                      | 714.2                              |
| <b>CCL3/4</b>      | 404.4 | ND     | ND     | 347.2  | ND    | 421.8        | 384.2         | 420.9 | 860.1 | 936.2                    | 66.4                      | 844.8                             | 155.8                      | 736.0                              |
| <b>CCL5</b>        | 71.8  | ND     | ND     | 236.4  | 140.9 | 148.3        | 148.4         | 170.8 | 567.2 | 257.9                    | 175.2                     | 628.7                             | 168.9                      | 611.3                              |
| <b>CCL7</b>        | 470.7 | ND     | 42.4   | 70.8   | 37.6  | 739.4        | 719.5         | 520.9 | 297.3 | 444.3                    | 541.5                     | 909.4                             | 726.1                      | 763.9                              |
| <b>CD14</b>        | 571.9 | ND     | 43.2   | ND     | ND    | 459.5        | 427.4         | 683.0 | 367.5 | 499.3                    | 490.0                     | 499.8                             | 333.2                      | 407.0                              |
| <b>CD26</b>        | 247.3 | 18.7   | 50.2   | 24.7   | ND    | 60.7         | ND            | 459.7 | 178.3 | 439.7                    | 559.3                     | 306.9                             | 355.3                      | 245.4                              |
| <b>CD30</b>        | ND    | 48.8   | ND     | ND     | ND    | ND           | ND            | 110.0 | 83.6  | 129.7                    | 43.6                      | 130.3                             | 42.5                       | 65.7                               |
| <b>CD40L</b>       | 83.5  | ND     | ND     | ND     | ND    | 59.9         | 79.4          | 176.7 | 100.1 | 226.4                    | 99.7                      | 188.3                             | 93.1                       | 135.7                              |
| <b>CD71</b>        | 201.5 | 83.0   | ND     | 53.4   | ND    | 218.9        | 94.2          | 487.4 | 324.6 | 413.9                    | 232.1                     | 228.5                             | 256.9                      | 353.4                              |
| <b>CFD</b>         | 563.1 | ND     | 396.1  | 432.2  | 103.2 | 691.8        | 602.4         | 666.7 | 326.3 | 625.4                    | 684.9                     | 716.6                             | 633.6                      | 560.1                              |
| <b>CHI3L1</b>      | 939.3 | ND     | 881.7  | 850.4  | ND    | 999.1        | 982.0         | 975.8 | 935.8 | 965.0                    | 990.2                     | 1026.6                            | 968.7                      | 982.8                              |
| <b>Cripto-1</b>    | ND    | ND     | ND     | ND     | ND    | ND           | ND            | ND    | ND    | ND                       | 42.0                      | 98.0                              | 39.0                       | 50.6                               |
| <b>CRP</b>         | ND    | ND     | ND     | ND     | ND    | 44.9         | 64.0          | 86.5  | 50.6  | 93.7                     | 71.7                      | 181.3                             | 65.0                       | 66.6                               |
| <b>CXCL1</b>       | 242.5 | ND     | 58.6   | ND     | ND    | 343.4        | 291.7         | 427.6 | 540.3 | 780.7                    | 260.1                     | 731.1                             | 659.0                      | 669.8                              |
| <b>CXCL10</b>      | 386.4 | ND     | ND     | 631.5  | ND    | 997.4        | 994.9         | 920.3 | 265.4 | 659.3                    | 1092.7                    | 1134.2                            | 1094.1                     | 1113.8                             |
| <b>CXCL11</b>      | 64.1  | ND     | ND     | ND     | ND    | ND           | 154.2         | 134.6 | 82.3  | 236.8                    | 101.8                     | 529.4                             | 110.4                      | 637.8                              |
| <b>CXCL12</b>      | 197.2 | 22.9   | ND     | 48.3   | ND    | 180.1        | 187.8         | 251.7 | 155.3 | 289.4                    | 567.6                     | 604.4                             | 616.3                      | 602.3                              |
| <b>CXCL4</b>       | 55.9  | ND     | ND     | ND     | ND    | 866.8        | 856.2         | 914.4 | 863.3 | 304.6                    | 55.7                      | 59.0                              | 155.9                      | 183.4                              |
| <b>CXCL5</b>       | 280.8 | ND     | 630.2  | ND     | ND    | 652.3        | 575.2         | 944.8 | 930.7 | 1036.7                   | 919.3                     | 1007.6                            | 938.3                      | 1000.3                             |
| <b>CXCL9</b>       | 93.8  | ND     | ND     | ND     | ND    | 937.9        | 942.3         | 906.2 | 409.7 | 480.3                    | 962.2                     | 961.6                             | 944.2                      | 886.3                              |
| <b>Cystatin C</b>  | 938.7 | ND     | ND     | 156.8  | ND    | 450.1        | 105.4         | 839.8 | 239.6 | 531.3                    | 441.6                     | 192.8                             | 263.1                      | 183.2                              |

|           | AML#3 | AML#18 | AML#23 | HL-60 | U937  | AML#3<br>+Mo | AML#23<br>+Mo | M-MΦ  | GM-MΦ  | R <sup>GM/GW</sup> -<br>MΦ | HD <sup>AML#3</sup> -<br>MΦ | HD <sup>AML#3</sup> -MΦ<br>+GM/GW | HD <sup>AML#23</sup> -<br>MΦ | HD <sup>AML#23</sup> -MΦ<br>+GM/GW |
|-----------|-------|--------|--------|-------|-------|--------------|---------------|-------|--------|----------------------------|-----------------------------|-----------------------------------|------------------------------|------------------------------------|
| Dkk-1     | 122.5 | ND     | ND     | 37.6  | ND    | 90.3         | 89.9          | 158.7 | 98.0   | 112.5                      | 88.3                        | 99.7                              | 55.1                         | 80.7                               |
| EGF       | ND    | ND     | ND     | ND    | ND    | 556.2        | 115.8         | 303.7 | 102.0  | ND                         | 76.0                        | 120.9                             | 53.7                         | 65.9                               |
| Endoglin  | 152.3 | ND     | 93.1   | ND    | ND    | 496.4        | 342.4         | 561.7 | 247.3  | 474.6                      | 251.7                       | 344.0                             | 245.3                        | 294.9                              |
| FasL      | 74.3  | ND     | ND     | ND    | ND    | ND           | ND            | 140.5 | 90.4   | 149.5                      | 95.7                        | 166.3                             | 76.9                         | 77.2                               |
| FGF-19    | 107.5 | ND     | ND     | 43.4  | ND    | 403.0        | 415.8         | 176.3 | 113.5  | 161.7                      | 420.8                       | 546.8                             | 384.5                        | 422.5                              |
| FGF-2     | ND    | ND     | ND     | ND    | ND    | 68.7         | 72.0          | 58.5  | 35.2   | 60.5                       | 65.9                        | 183.8                             | 58.2                         | 61.3                               |
| FGF-7     | ND    | ND     | ND     | ND    | ND    | ND           | ND            | ND    | ND     | ND                         | 39.8                        | 89.4                              | 32.1                         | 51.0                               |
| Flt-3 L   | ND    | ND     | ND     | ND    | ND    | ND           | ND            | 60.9  | ND     | ND                         | 31.7                        | 53.6                              | 25.4                         | 31.0                               |
| G-CSF     | ND    | ND     | ND     | ND    | ND    | ND           | ND            | ND    | ND     | 72.2                       | 39.6                        | 617.5                             | 98.0                         | 408.6                              |
| GDF-15    | 928.6 | 821.9  | 464.3  | ND    | ND    | 879.6        | 722.6         | 933.7 | 842.3  | 887.4                      | 710.9                       | 794.6                             | 674.8                        | 397.4                              |
| GH        | ND    | ND     | ND     | ND    | ND    | ND           | ND            | ND    | ND     | ND                         | 28.2                        | 65.2                              | 31.1                         | 45.1                               |
| GM-CSF    | 110.5 | ND     | ND     | ND    | ND    | 289.3        | 177.0         | 696.1 | 1015.1 | 1057.0                     | 842.3                       | 1136.3                            | 680.4                        | 1123.4                             |
| HGF       | 103.5 | ND     | 165.0  | 669.2 | ND    | 129.9        | 348.3         | 235.2 | 87.1   | 145.1                      | 168.4                       | 187.9                             | 241.2                        | 281.8                              |
| ICAM-1    | 122.7 | ND     | ND     | 182.5 | ND    | 281.7        | 197.7         | 288.5 | 191.9  | 367.5                      | 292.8                       | 657.3                             | 404.3                        | 438.2                              |
| IFN-γ     | 117.9 | 75.4   | 95.6   | 74.3  | 80.3  | ND           | 97.2          | 277.1 | 209.8  | 321.1                      | 231.1                       | 487.9                             | 106.1                        | 199.3                              |
| IGFBP-2   | ND    | ND     | ND     | 806.6 | 622.5 | 174.5        | ND            | 448.1 | ND     | 211.0                      | 45.2                        | 96.2                              | 241.3                        | 357.0                              |
| IGFBP-3   | ND    | ND     | ND     | ND    | ND    | ND           | ND            | ND    | ND     | ND                         | 99.0                        | 171.5                             | 96.8                         | 84.5                               |
| IL-1 R4   | ND    | ND     | ND     | 52.4  | ND    | ND           | ND            | ND    | ND     | ND                         | 36.3                        | 81.0                              | 48.4                         | 75.6                               |
| IL-10     | ND    | ND     | ND     | ND    | ND    | 223.7        | 161.4         | 145.8 | ND     | 77.3                       | 222.6                       | 369.3                             | 309.8                        | 335.3                              |
| IL-11     | 56.0  | ND     | ND     | ND    | ND    | 83.9         | 47.4          | 133.5 | 66.5   | 105.5                      | 161.4                       | 258.6                             | 169.5                        | 184.5                              |
| IL-12 p70 | ND    | ND     | ND     | ND    | ND    | 61.4         | ND            | 64.1  | ND     | 56.4                       | 69.1                        | 82.1                              | 42.3                         | 50.4                               |
| IL-13     | ND    | ND     | ND     | ND    | ND    | ND           | ND            | ND    | ND     | ND                         | 53.1                        | 95.8                              | 46.2                         | 69.1                               |
| IL-15     | ND    | ND     | ND     | ND    | ND    | 52.9         | 55.9          | ND    | ND     | ND                         | 56.0                        | 161.4                             | 67.1                         | 81.7                               |
| IL-16     | 72.6  | ND     | ND     | ND    | ND    | ND           | 115.8         | 133.6 | ND     | 124.2                      | 88.1                        | 157.8                             | 82.6                         | 95.5                               |
| IL-17A    | 103.4 | 22.5   | ND     | ND    | ND    | 424.0        | 383.8         | 244.5 | 186.0  | 369.3                      | 528.0                       | 754.1                             | 540.4                        | 507.9                              |
| IL-18 Bpa | 785.6 | ND     | 371.6  | 103.6 | 56.9  | 879.3        | 912.0         | 886.2 | 560.1  | 879.2                      | 850.3                       | 904.2                             | 795.2                        | 703.8                              |
| IL-19     | ND    | ND     | ND     | ND    | ND    | ND           | ND            | ND    | ND     | ND                         | 59.3                        | 137.9                             | 39.1                         | 371.2                              |
| IL-1α     | 99.7  | 44.2   | 43.7   | 29.6  | 34.1  | ND           | ND            | 206.2 | 143.0  | 209.7                      | 78.0                        | 309.3                             | 66.3                         | 83.5                               |
| IL-1β     | ND    | ND     | ND     | ND    | ND    | ND           | ND            | ND    | ND     | ND                         | 61.3                        | 341.6                             | 68.2                         | 83.7                               |
| IL-1ra    | 643.1 | ND     | 298.5  | 28.7  | ND    | 495.9        | 489.4         | 696.2 | 573.5  | 659.2                      | 609.8                       | 557.9                             | 449.8                        | 481.6                              |
| IL-2      | ND    | ND     | ND     | ND    | ND    | ND           | ND            | 92.7  | 151.9  | 458.1                      | 220.9                       | 317.8                             | 164.6                        | 127.5                              |
| IL-22     | 70.1  | ND     | ND     | ND    | ND    | 98.8         | 105.3         | 102.3 | 58.6   | 98.1                       | 349.9                       | 406.5                             | 271.8                        | 281.2                              |
| IL-23     | ND    | ND     | ND     | ND    | ND    | ND           | ND            | ND    | ND     | ND                         | 47.4                        | 129.9                             | 48.5                         | 68.6                               |
| IL-24     | 137.5 | ND     | ND     | ND    | ND    | ND           | 158.0         | 136.1 | ND     | 149.8                      | 146.2                       | 216.7                             | 125.0                        | 124.2                              |
| IL-27     | 110.6 | ND     | ND     | ND    | ND    | ND           | ND            | 104.2 | 165.9  | 297.2                      | 60.3                        | 199.1                             | 184.6                        | 70.4                               |
| IL-3      | ND    | ND     | ND     | ND    | ND    | ND           | ND            | ND    | 84.4   | ND                         | 38.8                        | 158.6                             | 54.8                         | 118.5                              |

|                  | AML#3  | AML#18 | AML#23 | HL-60  | U937  | AML#3<br>+Mo | AML#23<br>+Mo | M-MΦ   | GM-MΦ  | R <sup>GM/GW</sup> -<br>MΦ | HD <sup>AML#3</sup> -<br>MΦ | HD <sup>AML#3</sup> -MΦ<br>+GM/GW | HD <sup>AML#23</sup> -<br>MΦ | HD <sup>AML#23</sup> -MΦ<br>+GM/GW |
|------------------|--------|--------|--------|--------|-------|--------------|---------------|--------|--------|----------------------------|-----------------------------|-----------------------------------|------------------------------|------------------------------------|
| IL-31            | ND     | ND     | ND     | ND     | ND    | ND           | ND            | ND     | 55.3   | 121.3                      | 63.5                        | 106.5                             | 121.8                        | 82.4                               |
| IL-32            | ND     | ND     | ND     | ND     | ND    | ND           | ND            | 62.1   | 45.6   | 98.1                       | 84.9                        | 86.8                              | 50.2                         | 71.5                               |
| IL-33            | ND     | ND     | ND     | ND     | ND    | ND           | ND            | ND     | ND     | ND                         | 75.2                        | 90.8                              | 67.1                         | 80.5                               |
| IL-34            | ND     | ND     | ND     | ND     | ND    | ND           | ND            | ND     | ND     | ND                         | 64.1                        | 139.0                             | 64.9                         | 86.9                               |
| IL-4             | ND     | ND     | ND     | ND     | ND    | 75.6         | 86.5          | ND     | ND     | ND                         | 253.6                       | 377.7                             | 259.1                        | 275.5                              |
| IL-5             | 304.3  | 52.5   | 48.3   | ND     | 66.9  | ND           | ND            | 302.3  | 266.1  | 355.4                      | 15.3                        | 23.0                              | 12.8                         | 11.9                               |
| IL-6             | ND     | ND     | ND     | ND     | ND    | 75.9         | 113.0         | 114.8  | 172.8  | 418.9                      | 252.3                       | 974.8                             | 885.5                        | 912.0                              |
| IL-8             | 1002.8 | 44.7   | 916.5  | 924.7  | 863.5 | 1014.7       | 997.2         | 958.6  | 979.6  | 995.2                      | 1028.9                      | 1053.5                            | 997.5                        | 1013.7                             |
| Kallikrein 3     | 143.4  | 89.2   | 115.5  | 84.5   | 72.2  | ND           | ND            | 345.2  | 284.6  | 394.1                      | 192.8                       | 307.2                             | 170.0                        | 188.8                              |
| Leptin           | ND     | ND     | ND     | ND     | ND    | ND           | ND            | ND     | ND     | ND                         | 96.8                        | 91.8                              | 47.2                         | 58.1                               |
| LIF              | ND     | ND     | ND     | ND     | ND    | ND           | ND            | 137.6  | ND     | 84.6                       | 48.5                        | 114.5                             | 42.4                         | 43.8                               |
| Lipocalin-2      | 270.9  | 51.9   | 74.6   | 39.9   | 62.7  | 65.1         | 344.3         | 218.7  | 228.1  | 207.5                      | 83.8                        | 110.2                             | 65.4                         | 60.1                               |
| M-CSF            | 124.7  | 29.2   | ND     | ND     | ND    | 269.2        | ND            | 508.0  | 208.1  | 387.6                      | 926.6                       | 409.6                             | 522.9                        | 402.5                              |
| MIF              | 323.1  | 523.0  | 424.8  | 326.0  | 397.4 | 374.9        | 387.3         | 410.1  | 324.6  | 489.0                      | 462.2                       | 556.2                             | 329.9                        | 488.6                              |
| MMP-9            | 821.5  | ND     | 788.1  | 822.7  | 108.0 | 838.2        | 816.0         | 887.5  | 815.0  | 928.9                      | 1011.9                      | 1044.3                            | 1027.1                       | 997.9                              |
| MPO              | 246.2  | 44.6   | 491.7  | 86.5   | 43.6  | 277.8        | 802.2         | 320.3  | 297.6  | 291.9                      | 91.0                        | 58.0                              | 370.4                        | 246.4                              |
| Osteopontin      | 918.1  | 28.8   | 804.0  | 843.6  | 43.8  | 898.1        | 824.8         | 929.8  | 913.6  | 924.3                      | 801.4                       | 811.9                             | 848.7                        | 777.3                              |
| PDGF-AA          | 79.5   | 30.5   | ND     | 64.4   | 42.2  | 387.1        | 147.1         | 154.8  | 99.8   | 99.5                       | 148.2                       | 299.2                             | 367.0                        | 383.0                              |
| PDGF-AB/BB       | ND     | ND     | ND     | ND     | ND    | 373.5        | 108.4         | 455.7  | 209.1  | 317.7                      | 372.7                       | 409.1                             | 493.2                        | 382.9                              |
| PECAM-1          | 337.6  | ND     | 258.3  | 367.1  | ND    | 837.9        | 685.0         | 762.4  | 563.1  | 832.8                      | 537.5                       | 749.1                             | 506.7                        | 599.5                              |
| PTX3             | 223.4  | 113.1  | 134.8  | 104.3  | 93.4  | 83.1         | 72.9          | 353.5  | 283.0  | 350.1                      | 216.4                       | 415.7                             | 225.3                        | 293.4                              |
| RAGE             | ND     | ND     | ND     | ND     | ND    | ND           | ND            | ND     | ND     | ND                         | 64.5                        | 69.0                              | 56.1                         | 85.5                               |
| RBP-4            | ND     | ND     | ND     | ND     | ND    | 84.9         | 62.6          | ND     | ND     | ND                         | 113.0                       | 223.3                             | 98.8                         | 133.1                              |
| Relaxin-2        | 83.5   | ND     | ND     | ND     | ND    | ND           | ND            | 112.1  | 94.7   | 176.7                      | 55.6                        | 97.5                              | 71.2                         | 98.2                               |
| Resistin         | 87.8   | 48.4   | 154.5  | 1036.1 | 88.8  | 118.6        | 209.1         | 146.2  | 101.9  | 213.7                      | 240.4                       | 358.9                             | 193.6                        | 226.1                              |
| Serpin E1        | 992.2  | 369.5  | 762.5  | 966.7  | 828.8 | 1050.5       | 1032.4        | 1019.9 | 1017.0 | 1005.1                     | 925.8                       | 803.0                             | 781.1                        | 742.2                              |
| SHBG             | 139.3  | ND     | ND     | ND     | ND    | 162.7        | 116.6         | 195.6  | 127.4  | 197.9                      | 139.9                       | 115.3                             | 125.6                        | 104.0                              |
| TFF3             | ND     | ND     | ND     | ND     | ND    | ND           | ND            | ND     | ND     | ND                         | 52.1                        | 89.4                              | 50.4                         | 64.5                               |
| TGF-α            | 142.1  | ND     | ND     | ND     | ND    | 108.3        | ND            | 122.8  | 197.8  | 340.6                      | 33.5                        | 156.1                             | 32.4                         | 121.7                              |
| Thrombospondin-1 | 578.9  | ND     | 179.9  | 39.9   | ND    | 590.4        | 440.0         | 425.1  | 202.0  | 183.3                      | 445.9                       | 621.3                             | 271.9                        | 273.1                              |
| TIM-3            | 870.6  | ND     | 116.8  | 55.9   | ND    | 954.5        | 647.2         | 928.5  | 823.9  | 916.7                      | 925.0                       | 753.5                             | 764.1                        | 801.2                              |
| TNF-α            | ND     | ND     | ND     | ND     | ND    | 212.5        | 220.2         | 110.7  | 574.6  | 587.4                      | 54.8                        | 804.7                             | 80.4                         | 201.0                              |
| uPAR             | 888.2  | 22.6   | 461.3  | 598.0  | 261.6 | 854.6        | 754.5         | 847.7  | 815.4  | 890.7                      | 843.1                       | 860.3                             | 808.5                        | 826.9                              |
| VCAM-1           | 556.4  | ND     | ND     | ND     | ND    | 230.3        | 290.7         | 690.3  | 79.0   | 220.3                      | 67.3                        | 87.4                              | 68.6                         | 131.2                              |
| VEGF             | ND     | 934.7  | ND     | 1064.0 | 780.4 | ND           | ND            | 78.1   | ND     | 130.5                      | 86.2                        | 895.7                             | 679.4                        | 476.3                              |
| Vitamin D BP     | 59.4   | 52.0   | 48.0   | 54.8   | 40.4  | 78.4         | 52.0          | 208.0  | 176.2  | 274.2                      | 111.4                       | 143.3                             | 93.5                         | 104.0                              |
